# Supplementary material
Source: HighWire-hosted journal article supplement (https://bmjopen.bmj.com/content/10/5/e035824)
Supplement: inline-supplementary-material-1 [file inline-supplementary-material-1.pdf]

## Participating sites and ethics approval

| Participating sites (N=27)          | Local Human Research Ethics Committee                             | Approval Status        |
|-------------------------------------|-------------------------------------------------------------------|------------------------|
| <b>VICTORIA</b>                     |                                                                   |                        |
| Western Health                      | Western Health                                                    | Approved               |
| Monash Health                       | Monash Health                                                     | Approved               |
| Cabrini Hospital                    | Cabrini Health                                                    | Approved               |
| Epworth HealthCare                  | Epworth HealthCare                                                | Approved               |
| Barwon Health                       | Barwon Health                                                     | Approved               |
| St Vincent's Hospital Melbourne     | St Vincent's Hospital Melbourne                                   | Approved               |
| Eastern Health                      | Eastern Health                                                    | Approved               |
| Northern Health                     | Northern Health                                                   | Approved               |
| Austin Health                       | Austin Health                                                     | Approved               |
| <b>NEW SOUTH WALES</b>              |                                                                   |                        |
| Royal Prince Alfred Hospital        | Sydney Local Health District                                      | Approved               |
| John Hunter Hospital                | Hunter New England Local Health District                          | Approved               |
| St George Hospital                  | South Eastern Sydney Local Health District                        | Approved               |
| Liverpool Hospital                  | South Western Sydney Local Health District                        | Approved               |
| Bankstown-Lidcombe Hospital         | South Western Sydney Local Health District                        | Approved               |
| Concord Hospital                    | Sydney Local Health District                                      | Approved               |
| Westmead Hospital                   | Western Sydney Local Health District                              | Submitted for approval |
| Prince of Wales Hospital            | South Eastern Sydney Local Health District                        | Approved               |
| <b>QUEENSLAND</b>                   |                                                                   |                        |
| Princess Alexandra Hospital         | Princess Alexandra Hospital                                       | Approved               |
| Sunshine Coast University Hospital  | Sunshine Coast Hospital and Health Service                        | Approved               |
| Royal Brisbane Hospital             | Royal Brisbane and Women's Hospital                               | Approved               |
| The Townsville Hospital             | Townsville Hospital and Health Service                            | Approved               |
| <b>SOUTH AUSTRALIA</b>              |                                                                   |                        |
| Flinders Medical Centre             | Southern Adelaide Local Health Network                            | Approved               |
| The Queen Elizabeth Hospital        | Central Adelaide Local Health Network                             | Approved               |
| The Royal Adelaide Hospital         | Central Adelaide Local Health Network                             | Approved               |
| <b>AUSTRALIAN CAPITAL TERRITORY</b> |                                                                   |                        |
| Canberra Hospital                   | Australian Capital Territory Health                               | Approved               |
| <b>WESTERN AUSTRALIA</b>            |                                                                   |                        |
| Sir Charles Gairdner Hospital       | Government of Western Australia North Metropolitan Health Service | Approved               |
| Fiona Stanley Hospital              | Government of Western Australia South Metropolitan Health Service | Approved               |
